# Supplementary material for: A Fusion Method for Multisource Land Cover Products Based on Superpixels and Statistical Extraction for Enhancing Resolution and Improving Accuracy
Source: MDPI journal article supplement (doi:10.3390/rs14071676), 2022-03-31
Supplement: s1 [file s1]

**Table S1.** The classification system used in this paper.

|                  | CCI-LC                                                                                                                                                                                                                                                                                                                 | UN-LCCS                                                                                                                                                                                                                                                                                                                                                            | IGBP                                                                                                                                                               | FROM-GLC                                                                                                                                     |
|------------------|------------------------------------------------------------------------------------------------------------------------------------------------------------------------------------------------------------------------------------------------------------------------------------------------------------------------|--------------------------------------------------------------------------------------------------------------------------------------------------------------------------------------------------------------------------------------------------------------------------------------------------------------------------------------------------------------------|--------------------------------------------------------------------------------------------------------------------------------------------------------------------|----------------------------------------------------------------------------------------------------------------------------------------------|
| <b>Cropland</b>  | 10 Cropland, rainfed                                                                                                                                                                                                                                                                                                   |                                                                                                                                                                                                                                                                                                                                                                    |                                                                                                                                                                    |                                                                                                                                              |
|                  | 20 Cropland, irrigated or post-flooding 30                                                                                                                                                                                                                                                                             | 40 Cultivated and managed vegetation/agriculture (cropland)                                                                                                                                                                                                                                                                                                        | 10 Croplands 13                                                                                                                                                    | 11 Rice paddy 12 Greenhouse 13                                                                                                               |
|                  | Mosaic cropland (>50%)/natural vegetation (tree, shrub, herbaceous cover) (<50%)                                                                                                                                                                                                                                       |                                                                                                                                                                                                                                                                                                                                                                    | Cropland/natural vegetation mosaics                                                                                                                                | Other cropland 14 Orchard 15 Bare farmland                                                                                                   |
|                  |                                                                                                                                                                                                                                                                                                                        | 111 Closed (>70%) evergreen needle leaf 112 Closed to open (>70%)                                                                                                                                                                                                                                                                                                  |                                                                                                                                                                    |                                                                                                                                              |
|                  | 50 Tree cover, broadleaved, evergreen, closed to open (>15%) 60 Tree cover, broadleaved, deciduous, closed to open (>15%) 70 Tree cover, needle-leaved, evergreen, closed to open (>15%) 80 Tree cover, needle-leaved, deciduous, closed to open (>15%) 90 Tree cover, mixed leaf type (broadleaved and needle-leaved) | evergreen, broadleaf 113 Closed (>70%) deciduous needle leaf 114 Closed (>70%) deciduous broadleaf 115 Closed forest, mixed 116 Closed forest, unknown 121 Open (15–70%) evergreen needle leaf 122 Open (15–70%) evergreen broadleaf 123 Open (15–70%) deciduous needle-leaf 124 Open (15–70%) deciduous broadleaf 125 Open forest, mixed 126 Open forest, unknown | 20 Woody savannas 21 Evergreen broadleaf forests 22 Deciduous broadleaf forests 23 Evergreen needle-leaf forests 24 Deciduous needle-leaf forests 25 Mixed forests | 21 Broadleaf, leaf-on 22 Broadleaf, leaf-off 23 Needle-leaf, leaf-on 24 Needle-leaf, leaf-off 25 Mixed leaf, leaf-on 26 Mixed leaf, leaf-off |
|                  |                                                                                                                                                                                                                                                                                                                        |                                                                                                                                                                                                                                                                                                                                                                    |                                                                                                                                                                    |                                                                                                                                              |
|                  |                                                                                                                                                                                                                                                                                                                        |                                                                                                                                                                                                                                                                                                                                                                    |                                                                                                                                                                    |                                                                                                                                              |
| <b>Forest</b>    | 110 Mosaic herbaceous cover (>50%)/tree and shrub (<50%) 130 Grassland                                                                                                                                                                                                                                                 | 30 Herbaceous vegetation (tree and shrub coverage <10%)                                                                                                                                                                                                                                                                                                            | 30 Grasslands                                                                                                                                                      | 31 Pasture 32 Natural grassland 33 Grassland, leaf-off                                                                                       |
|                  |                                                                                                                                                                                                                                                                                                                        |                                                                                                                                                                                                                                                                                                                                                                    |                                                                                                                                                                    |                                                                                                                                              |
|                  |                                                                                                                                                                                                                                                                                                                        |                                                                                                                                                                                                                                                                                                                                                                    |                                                                                                                                                                    |                                                                                                                                              |
| <b>Shrubland</b> | 120 Shrubland                                                                                                                                                                                                                                                                                                          | 20 Shrubs (perennial woody plant without                                                                                                                                                                                                                                                                                                                           |                                                                                                                                                                    |                                                                                                                                              |
|                  |                                                                                                                                                                                                                                                                                                                        |                                                                                                                                                                                                                                                                                                                                                                    |                                                                                                                                                                    |                                                                                                                                              |

|                                   |                                                                                         |                                                      |                                          |                                                      |
|-----------------------------------|-----------------------------------------------------------------------------------------|------------------------------------------------------|------------------------------------------|------------------------------------------------------|
|                                   |                                                                                         | clear main stem,<br>height <5 m)                     | 40 Closed/open<br>shrublands,<br>savanna | 41 Shrubland,<br>leaf-on 42<br>Shrubland, leaf-off   |
| <b>Water</b>                      | 210 Water bodies                                                                        | 80 Permanent water<br>bodies 200 Open sea            | 50 Water bodies                          | 60 Water                                             |
| <b>Urban/Built up</b>             | 190 Urban areas                                                                         | 50 Urban/built up                                    | 60 Urban and<br>built-up lands           | 80 Impervious<br>surface                             |
| <b>Bare land</b>                  | 200 Bare areas 150<br>Sparse vegetation<br>(tree, shrub,<br>herbaceous cover)<br>(<15%) | 60 Bare/sparse<br>vegetation (tree<br>coverage <10%) | 70 Barren sparse<br>vegetation           | 90 Bareland                                          |
| <b>Permanent<br/>snow and ice</b> | 220 Permanent snow<br>and ice                                                           | 70 Snow and ice                                      | 80 Permanent<br>snow and ice             | 101 Snow 102 Ice                                     |
| <b>Wetland</b>                    | 160 Tree cover,<br>flooded, fresh or<br>brackish water 170                              | 90 Herbaceous<br>wetland                             | 100 Permanent<br>wetlands                | 51 Marshland 52<br>Mudflat 53<br>Marshland, leaf-off |

Tree cover, flooded,  
saline water 180  
Shrub or herbaceous  
cover, flooded,  
fresh/saline/  
brackish water

**Table S2.** Validation point confusion matrix for CCI-LC

| Class                     | Cropland | Forest | Grassland | Shrubland | Water  | Urban/Built<br>up | Bare<br>land | Permanent<br>snow and<br>ice | Wetland | Total | PA     | OA     | Kappa |
|---------------------------|----------|--------|-----------|-----------|--------|-------------------|--------------|------------------------------|---------|-------|--------|--------|-------|
| Cropland                  | 247      | 25     | 12        | 2         | 4      | 61                | 1            | 0                            | 3       | 355   | 69.58% | 68.41% | 0.60  |
| Forest                    | 104      | 408    | 28        | 0         | 3      | 7                 | 0            | 0                            | 15      | 565   | 72.21% |        |       |
| Grassland                 | 20       | 10     | 106       | 15        | 0      | 2                 | 0            | 0                            | 2       | 155   | 68.39% |        |       |
| Shrubland                 | 10       | 6      | 12        | 46        | 0      | 0                 | 0            | 0                            | 2       | 76    | 60.53% |        |       |
| Water                     | 9        | 1      | 5         | 0         | 60     | 7                 | 1            | 0                            | 3       | 86    | 69.77% |        |       |
| Urban/Built<br>up         | 19       | 1      | 5         | 0         | 4      | 71                | 0            | 0                            | 0       | 100   | 71.00% |        |       |
| Bare land                 | 6        | 3      | 6         | 0         | 2      | 3                 | 34           | 8                            | 0       | 62    | 54.84% |        |       |
| Permanent<br>snow and ice | 1        | 2      | 24        | 0         | 0      | 0                 | 4            | 26                           | 0       | 57    | 45.61% |        |       |
| Wetland                   | 5        | 5      | 2         | 1         | 5      | 0                 | 0            | 0                            | 33      | 51    | 64.71% |        |       |
| Total                     | 421      | 461    | 200       | 64        | 78     | 151               | 40           | 34                           | 58      | 1507  |        |        |       |
| UA                        | 58.67%   | 88.50% | 53.00%    | 71.88%    | 76.92% | 47.02%            | 85.00%       | 76.47%                       | 56.90%  |       |        |        |       |

**Table S3.** Validation point confusion matrix for CGLS

| Class                     | Cropland | Forest | Grassland | Shrubland | Water  | Urban/Built<br>up | Bare<br>land | Permanent<br>snow and<br>ice | Wetland | Total | PA     | OA     | Kappa |
|---------------------------|----------|--------|-----------|-----------|--------|-------------------|--------------|------------------------------|---------|-------|--------|--------|-------|
| Cropland                  | 271      | 60     | 3         | 0         | 4      | 12                | 0            | 0                            | 5       | 355   | 76.34% | 74.05% | 0.66  |
| Forest                    | 100      | 457    | 2         | 1         | 0      | 4                 | 0            | 0                            | 1       | 565   | 80.88% |        |       |
| Grassland                 | 21       | 32     | 94        | 1         | 1      | 6                 | 0            | 0                            | 0       | 155   | 60.65% |        |       |
| Shrubland                 | 5        | 22     | 2         | 46        | 0      | 1                 | 0            | 0                            | 0       | 76    | 60.53% |        |       |
| Water                     | 12       | 2      | 2         | 1         | 61     | 8                 | 0            | 0                            | 0       | 86    | 70.93% |        |       |
| Urban/Built<br>up         | 15       | 11     | 0         | 1         | 1      | 72                | 0            | 0                            | 0       | 100   | 72.00% |        |       |
| Bare land                 | 3        | 2      | 9         | 3         | 1      | 2                 | 41           | 1                            | 0       | 62    | 66.13% |        |       |
| Permanent<br>snow and ice | 0        | 0      | 3         | 1         | 0      | 0                 | 13           | 40                           | 0       | 57    | 70.18% |        |       |
| Wetland                   | 7        | 7      | 0         | 1         | 2      | 0                 | 0            | 0                            | 34      | 51    | 66.67% |        |       |
| Total                     | 434      | 593    | 115       | 55        | 70     | 105               | 54           | 41                           | 40      | 1507  |        |        |       |
| UA                        | 62.44%   | 77.07% | 81.74%    | 83.64%    | 87.14% | 68.57%            | 75.93%       | 97.56%                       | 85.00%  |       |        |        |       |

**Table S4.** Validation point confusion matrix for FROM-GLC

| Class             | Cropland | Forest | Grassland | Shrubland | Water | Urban/Built<br>up | Bare<br>land | Permanent<br>snow and<br>ice | Wetland | Total | PA     | OA     | Kappa |
|-------------------|----------|--------|-----------|-----------|-------|-------------------|--------------|------------------------------|---------|-------|--------|--------|-------|
| Cropland          | 197      | 78     | 51        | 4         | 11    | 8                 | 0            | 0                            | 6       | 355   | 55.49% | 65.56% | 0.56  |
| Forest            | 82       | 406    | 49        | 19        | 3     | 5                 | 1            | 0                            | 0       | 565   | 71.86% |        |       |
| Grassland         | 12       | 12     | 108       | 8         | 1     | 1                 | 2            | 8                            | 3       | 155   | 69.68% |        |       |
| Shrubland         | 6        | 13     | 13        | 44        | 0     | 0                 | 0            | 0                            | 0       | 76    | 57.89% |        |       |
| Water             | 6        | 4      | 1         | 0         | 62    | 12                | 1            | 0                            | 0       | 86    | 72.09% |        |       |
| Urban/Built<br>up | 13       | 1      | 14        | 0         | 3     | 66                | 3            | 0                            | 0       | 100   | 66.00% |        |       |
| Bare land         | 2        | 2      | 10        | 0         | 5     | 1                 | 40           | 1                            | 1       | 62    | 64.52% |        |       |

|                        |        |        |        |        |        |        |        |        |        |      |        |
|------------------------|--------|--------|--------|--------|--------|--------|--------|--------|--------|------|--------|
| Permanent snow and ice | 0      | 1      | 2      | 0      | 8      | 0      | 12     | 34     | 0      | 57   | 59.65% |
| Wetland                | 6      | 4      | 1      | 0      | 9      | 0      | 0      | 0      | 31     | 51   | 60.78% |
| Total                  | 324    | 521    | 249    | 75     | 102    | 93     | 59     | 43     | 41     | 1507 |        |
| UA                     | 60.80% | 77.93% | 43.37% | 58.67% | 60.78% | 70.97% | 67.80% | 79.07% | 75.61% |      |        |

**Table S5.** Validation point confusion matrix for MCD12Q1

| Class                  | Cropland | Forest | Grassland | Shrubland | Water  | Urban/Built up | Bare land | Permanent snow and ice | Wetland | Total | PA     | OA     | Kappa |
|------------------------|----------|--------|-----------|-----------|--------|----------------|-----------|------------------------|---------|-------|--------|--------|-------|
| Cropland               | 250      | 40     | 45        | 0         | 2      | 9              | 1         | 0                      | 8       | 355   | 70.42% | 61.63% | 0.52  |
| Forest                 | 90       | 325    | 101       | 32        | 3      | 0              | 0         | 0                      | 14      | 565   | 57.52% |        |       |
| Grassland              | 10       | 33     | 97        | 0         | 1      | 4              | 0         | 9                      | 1       | 155   | 62.58% |        |       |
| Shrubland              | 4        | 25     | 5         | 42        | 0      | 0              | 0         | 0                      | 0       | 76    | 55.26% |        |       |
| Water                  | 3        | 12     | 4         | 0         | 53     | 7              | 1         | 0                      | 6       | 86    | 61.63% |        |       |
| Urban/Built up         | 9        | 15     | 5         | 0         | 1      | 69             | 0         | 0                      | 1       | 100   | 69.00% |        |       |
| Bare land              | 5        | 4      | 16        | 1         | 2      | 3              | 31        | 0                      | 0       | 62    | 50.00% |        |       |
| Permanent snow and ice | 0        | 0      | 5         | 0         | 0      | 0              | 16        | 36                     | 0       | 57    | 63.16% |        |       |
| Wetland                | 5        | 11     | 6         | 2         | 2      | 0              | 0         | 0                      | 27      | 53    | 50.94% |        |       |
| Total                  | 376      | 465    | 284       | 77        | 64     | 92             | 49        | 45                     | 57      | 1509  |        |        |       |
| UA                     | 66.49%   | 69.89% | 34.15%    | 54.55%    | 82.81% | 75.00%         | 63.27%    | 80.00%                 | 47.37%  |       |        |        |       |

**Table S6.** Confusion matrix for GFSAD30 assessment result

| Class       | Cropland | No-Cropland | Total | PA     | OA     | Kappa |
|-------------|----------|-------------|-------|--------|--------|-------|
| Cropland    | 265      | 90          | 355   | 74.65% | 77.90% | 0.47  |
| No-Cropland | 243      | 909         | 1152  | 78.91% |        |       |
| Total       | 508      | 999         | 1507  |        |        |       |
| UA          | 52.17%   | 90.99%      |       |        |        |       |

**Table S7.** Confusion matrix for PLASAR assessment result

| Class     | Forest | No-Forest | Total | PA     | OA     | Kappa |
|-----------|--------|-----------|-------|--------|--------|-------|
| Forest    | 372    | 193       | 565   | 65.84% | 73.32% | 0.43  |
| No-Forest | 209    | 733       | 942   | 77.81% |        |       |
| Total     | 581    | 926       | 1507  |        |        |       |
| UA        | 64.03% | 79.16%    |       |        |        |       |

**Table S8.** Confusion matrix for GWSD assessment result

| Class    | Water  | No-Water | Total | PA     | OA     | Kappa |
|----------|--------|----------|-------|--------|--------|-------|
| Water    | 68     | 18       | 86    | 79.07% | 95.62% | 0.65  |
| No-Water | 48     | 1373     | 1421  | 96.62% |        |       |
| Total    | 116    | 1391     | 1507  |        |        |       |
| UA       | 58.62% | 98.71%   |       |        |        |       |

**Table S9.** Confusion matrix for GHS-BUILT assessment result

| Class    | Urban  | No-Urban | Total | PA     | OA     | Kappa |
|----------|--------|----------|-------|--------|--------|-------|
| Urban    | 74     | 26       | 100   | 74.00% | 82.95% | 0.29  |
| No-Urban | 231    | 1176     | 1407  | 83.58% |        |       |
| Total    | 305    | 1202     | 1507  |        |        |       |
| UA       | 24.26% | 97.84%   |       |        |        |       |

**Table S10.** Confusion matrix for cropland correction results

| Class       | Cropland | No-Cropland | Total | PA     | OA     | Kappa |
|-------------|----------|-------------|-------|--------|--------|-------|
| Cropland    | 307      | 48          | 355   | 86.48% | 92.50% | 0.80  |
| No-Cropland | 65       | 1087        | 1152  | 94.36% |        |       |
| Total       | 372      | 1135        | 1507  |        |        |       |
| UA          | 82.53%   | 95.77%      |       |        |        |       |

**Table S11.** Confusion matrix for forest correction results

| Class     | Forest | No-Forest | Total | PA     | OA     | Kappa |
|-----------|--------|-----------|-------|--------|--------|-------|
| Forest    | 517    | 48        | 565   | 91.50% | 94.03% | 0.87  |
| No-Forest | 42     | 900       | 942   | 95.54% |        |       |
| Total     | 559    | 948       | 1507  |        |        |       |
| UA        | 92.49% | 94.94%    |       |        |        |       |

**Table S12.** Confusion matrix for water correction results

| Class    | Water  | No-Water | Total | PA     | OA     | Kappa |
|----------|--------|----------|-------|--------|--------|-------|
| Water    | 75     | 11       | 86    | 87.21% | 98.61% | 0.87  |
| No-Water | 10     | 1411     | 1421  | 99.30% |        |       |
| Total    | 85     | 1422     | 1507  |        |        |       |
| UA       | 88.24% | 99.23%   |       |        |        |       |

**Table S13.** Confusion matrix for urban / built up correction results

| Class             | Urban/Built up | No-Urban/built up | Total | PA     | OA     | Kappa |
|-------------------|----------------|-------------------|-------|--------|--------|-------|
| Urban/Built up    | 82             | 18                | 100   | 82.00% | 98.21% | 0.85  |
| No-Urban/Built up | 9              | 1398              | 1407  | 99.36% |        |       |
| Total             | 91             | 1416              | 1507  |        |        |       |
| UA                | 90.11%         | 98.73%            |       |        |        |       |
